# Supplementary material
Source: PubMed Central journal article supplement (PMC3528089)
Supplement: Supp_Fig1.pdf [file Supp_Fig1.pdf]

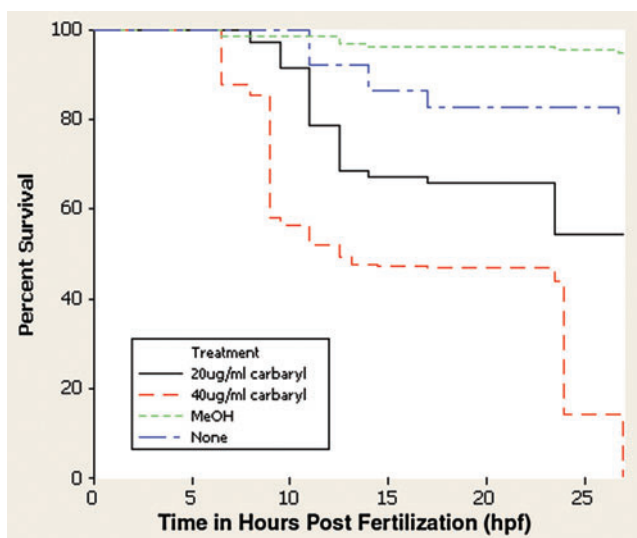

**SUPPLEMENTARY FIG. S1.** Carbaryl induces death prior to 24 hpf in a dose-dependent manner. Kaplan-Meier survival plots are shown for the different treatment types: none (blue;  $n=40$ ), MeOH (green;  $n=161$ ), 20  $\mu\text{g}/\text{mL}$  carbaryl (black;  $n=70$ ), and 40  $\mu\text{g}/\text{mL}$  carbaryl (red;  $n=260$ ). Treatment time was 3.5 hpf and mortality was recorded for the first 27 hours of development. Embryos were considered dead at 27 hpf if they did not have a heartbeat.
