# Supplementary material
Source: PubMed Central journal article supplement (PMC3528089)
Supplement: Supp_Fig2.pdf [file Supp_Fig2.pdf]

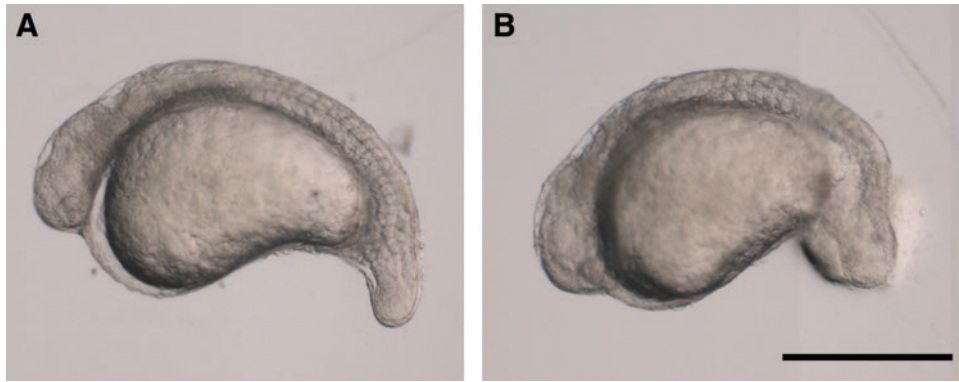

**SUPPLEMENTARY FIG. S2.** 40  $\mu\text{g}/\text{mL}$  carbaryl-treated embryos exhibit severe morphological defects. Lateral views of 40  $\mu\text{g}/\text{mL}$  carbaryl-treated embryos at 24 hpf (**A** and **B**). Development of these embryos is severely delayed/compromised and many morphological defects are present, such as elongated yolk and truncated tails. Embryos have been treated with PTU, and different focal plane images were merged in Photoshop to produce compiled images. *Scale bar:* 500  $\mu\text{m}$ .
