# Supplementary material
Source: PubMed Central journal article supplement (PMC3528089)
Supplement: Supp_Fig3.pdf [file Supp_Fig3.pdf]

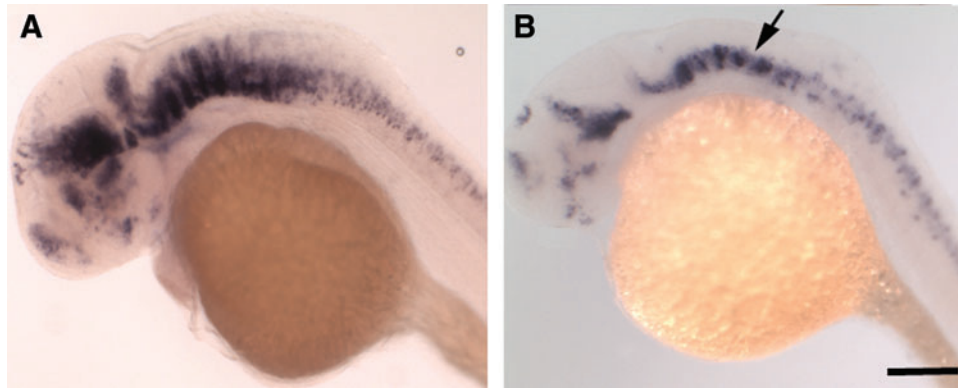

**SUPPLEMENTARY FIG. S3.** Carbaryl-treated embryos have a decrease in *geflitin 1* positive neurons in the brain region. Lateral views of whole-mount RNA *in situ* hybridization using *geflitin 1* on MeOH control (A) and carbaryl-treated (B) embryos at 36 hpf. *Arrow* indicates reduced expression of *geflitin 1* positive neurons in the hindbrain regions of the embryo. *Scale bar*: 75  $\mu$ m.
